# Supplementary material for: Pregnancy-associated plasma protein-aa supports hair cell survival by regulating mitochondrial function
Source: eLife. 2019 Jun 17;8:e47061. doi: 10.7554/eLife.47061 (PMC6594750; doi:10.7554/eLife.47061)
Supplement: Figure 1—source data 1. [file elife-47061-fig1-data1.xlsx]

## Sheet: 1
Figure 1B: hair cell survival post neomycin in wild type and Tg(hsp70:dnIGF1Ra-GFP) larvae
mean number of hair cells within 3 neuromasts per larva
	no heatshock
	wild type																					hsp70:dnIGF1Ra-GFP
Neomycin	0 μM				10 μM				0 μM				1 μM				30 μM					0 μM				10 μM				0 μM				1 μM				30 μM
	neuromast 1	neuromast 2	neuromast 3	mean	neuromast 1	neuromast 2	neuromast 3	mean	neuromast 1	neuromast 2	neuromast 3	mean	neuromast 1	neuromast 2	neuromast 3	mean	neuromast 1	neuromast 2	neuromast 3	mean		neuromast 1	neuromast 2	neuromast 3	mean	neuromast 1	neuromast 2	neuromast 3	mean	neuromast 1	neuromast 2	neuromast 3	mean	neuromast 1	neuromast 2	neuromast 3	mean	neuromast 1	neuromast 2	neuromast 3	mean
larva 1	12	14	22	16	8	6	5	6.33333	15	14	13	14	16	9	13	12.6667	7	3	6	5.33333		15	17	12	14.6667	8	4	3	5	15	19	11	15	11	13	15	13	5	3	3	3.66667
larva 2	15	12	21	16	9	7	6	7.33333	15	15	16	15.3333	10	10	9	9.66667	9	2	7	6		16	20	8	14.6667	5	5	6	5.33333	16	17	21	18	16	14	14	14.6667	5	8	4	5.66667
larva 3	15	18	15	16	5	8	5	6	16	10	15	13.6667	14	11	13	12.6667	6	4	2	4		18	20	12	16.6667	6	6	4	5.33333	20	9	21	16.6667	16	9	15	13.3333	9	4	5	6
larva 4	6	9	10	8.33333	12	6	4	7.33333	16	15	15	15.3333	16	9	7	10.6667	3	3	2	2.66667		18	18	11	15.6667	5	5	6	5.33333	16	11	18	15	10	16	15	13.6667	5	4	8	5.66667
larva 5	16	13	9	12.6667	6	6	7	6.33333	18	13	16	15.6667	9	18	13	13.3333	4	6	4	4.66667		6	8	10	8	6	6	8	6.66667	20	16	19	18.3333	18	11	6	11.6667	5	6	2	4.33333
larva 6	14	14	18	15.3333	4	7	6	5.66667	15	17	15	15.6667	13	15	12	13.3333	4	2	5	3.66667		18	13	12	14.3333	5	5	8	6	18	17	20	18.3333	17	13	10	13.3333	5	2	5	4
larva 7	12	18	22	17.3333	3	7	9	6.33333	15	14	13	14	16	11	7	11.3333	8	4	7	6.33333		20	15	15	16.6667	4	4	6	4.66667	15	16	16	15.6667	16	14	13	14.3333	7	4	5	5.33333
larva 8	14	17	22	17.6667	6	9	6	7					17	12	18	15.6667	3	5	5	4.33333		13	10	19	14	5	6	5	5.33333	16	12	14	14	13	12	11	12	3	4	5	4
larva 9					6	5	5	5.33333																		7	8	5	6.66667
larva 10																										6	6	5	5.66667
larva 11
larva 12
mean				14.9167				6.40741				14.8095				12.4167				4.625					14				5.88889				16.7143				12				4
% HC survival=[(mean number of hair cells within 3 neuromasts after treatment)/ (mean number of hair cells in no heatshock and vehicle treated group)] X 100
					heatshock
					wild type																	hsp70:dnIGF1Ra-GFP
				Neomycin	0 μM				10 μM				1 μM				30 μM					0 μM				10 μM				1 μM				30 μM
					neuromast 1	neuromast 2	neuromast 3	mean	neuromast 1	neuromast 2	neuromast 3	mean	neuromast 1	neuromast 2	neuromast 3	mean	neuromast 1	neuromast 2	neuromast 3	mean		neuromast 1	neuromast 2	neuromast 3	mean	neuromast 1	neuromast 2	neuromast 3	mean	neuromast 1	neuromast 2	neuromast 3	mean	neuromast 1	neuromast 2	neuromast 3	mean
				larva 1	13	17	20	16.6667	7	10	4	7	14	13	8	11.6667	4	5	5	4.66667		15	9	18	14	6	5	2	4.33333	10	10	15	11.6667	8	6	5	6.33333
				larva 2	12	15	15	14	12	4	8	8	12	13	9	11.3333	4	5	5	4.66667		14	11	10	11.6667	2	4	3	3	11	7	9	9	4	0	2	2
				larva 3	15	20	10	15	9	8	11	9.33333	13	16	12	13.6667	7	3	5	5		10	16	15	13.6667	4	4	2	3.33333	5	6	10	7	6	4	3	4.33333
				larva 4	10	11	18	13	6	3	6	5	13	14	19	15.3333	1	6	4	3.66667		12	12	19	14.3333	1	6	6	4.33333	12	11	11	11.3333	5	6	4	5
				larva 5	16	15	15	15.3333	10	6	5	7	16	12	10	12.6667	3	4	2	3		11	9	8	9.33333	2	2	1	1.66667	9	10	11	10	3	5	4	4
				larva 6	18	17	9	14.6667	5	6	2	4.33333	12	11	17	13.3333	5	5	4	4.66667		16	11	9	12	4	3	2	3	10	7	5	7.33333	3	2	3	2.66667
				larva 7	15	13	20	16	5	4	4	4.33333	12	8	11	10.3333	5	6	7	6		15	13	16	14.6667	4	4	2	3.33333	13	10	10	11	3	2	3	2.66667
				larva 8	12	17	19	16	6	6	6	6	13	12	11	12	6	4	5	5		10	16	13	13	7	5	3	5					2	5	1	2.66667
				larva 9					7	7	6	6.66667										13	20	18	17	2	7	2	3.66667					3	3	1	2.33333
				larva 10					6	5	3	4.66667										18	11	20	16.3333	3	3	3	3					3	3	0	2
				larva 11					6	5	5	5.33333														6	4	5	5					4	1	1	2
				larva 12					9	7	8	8																						2	2	6	3.33333
				larva 13																														1	4	2	2.33333
				larva 14																														3	0	0	1
				mean				15.0833				6.30556				12.5417				4.58333					13.6				3.60606				9.61905				3.04762
	no heatshock			heatshock						no heatshock			heatshock
	wild type									hsp70:dnIGF1Ra-GFP
Neomycin	1 μM	10 μM	30 μM	0 μM	1 μM	10 μM	30 μM			1 μM	10 μM	30 μM	0 μM	1 μM	10 μM	30 μM
larva 1	85.5278	42.4486	36.0117	112.537	78.7756	46.9169	31.5102			77.7977	35.7143	21.9429	100	69.8185	30.9524	37.9015
larva 2	65.2712	49.151	40.5132	94.5307	76.5249	53.6193	31.5102			87.7718	38.0952	33.9118	83.3333	53.86	21.4286	11.9689
larva 3	85.5278	40.2145	27.0088	101.283	92.28	62.5559	33.761			79.7925	38.0952	35.9066	97.619	41.8911	23.8095	25.9326
larva 4	72.0234	49.151	18.0059	87.7785	103.534	33.5121	24.758			81.7874	38.0952	33.9118	102.381	67.8237	30.9524	29.9222
larva 5	90.0293	42.4486	31.5102	103.534	85.5278	46.9169	20.2566			69.8185	47.619	25.9326	66.6667	59.8444	11.9048	23.9378
larva 6	90.0293	37.9803	24.758	99.0322	90.0293	29.0438	31.5102			79.7925	42.8571	23.9378	85.7143	43.8859	21.4286	15.9585
larva 7	76.5249	42.4486	42.7639	108.035	69.7727	29.0438	40.5132			85.777	33.3333	31.917	104.762	65.8288	23.8095	15.9585
larva 8	105.784	46.9169	29.2595	108.035	81.0263	40.2145	33.761			71.8133	38.0952	23.9378	92.8571		35.7143	15.9585
larva 9		35.7462				44.6828					47.619		121.429		26.1905	13.9637
larva 10						31.2779					40.4762		116.667		21.4286	11.9689
larva 11						35.7462									35.7143	11.9689
larva 12						53.6193										19.9481
larva 13																13.9637
larva 14																5.98444
mean hair cell survival (% vehicle-treated group	83.8397	42.9451	31.2289	101.846	84.6838	42.2624	30.9476			79.2938	40	28.9248	97.1429	57.5646	25.7576	18.2383
P-value by 2-way ANOVA (TLF vs. hsp70:dnIGF1R-GFP)										0.6825	0.6788	0.6788	0.484	<0.0001	<0.0001	0.0093
P-value by 2-way ANOVA (hsp70:dnIGF1R-GFP: no heatshock vs. heatshock)														<0.0001	0.0014	0.0005
