# Supplementary material for: Pregnancy-associated plasma protein-aa supports hair cell survival by regulating mitochondrial function
Source: eLife. 2019 Jun 17;8:e47061. doi: 10.7554/eLife.47061 (PMC6594750; doi:10.7554/eLife.47061)
Supplement: Figure 1—source data 2. [file elife-47061-fig1-data2.xlsx]

## Sheet: 1
Figure 1D-D': Mean F(TMRE) and ratio of mean F(TMRE) to mean F(GFP) in wild type hair cells
	untreated
	F(TMRE)					F(GFP)					F(TMRE)/F(GFP)
larva	neuromast 1	neuromast 2	neuromast 3	neuromast 4	mean	neuromast 1	neuromast 2	neuromast 3	neuromast 4	mean
1	8.41073e+07	6.01209e+07	4.58505e+07		6.33596e+07	6.68763e+08	5.24254e+08	4.79476e+08		5.57498e+08	0.11365
2	9.27442e+07	1.07411e+08	7.72743e+07		9.24765e+07	4.33313e+08	5.21798e+08	4.14566e+08		4.56559e+08	0.202551
3	7.33553e+07	1.08089e+08			9.07223e+07	6.19491e+08	8.10088e+08			7.1479e+08	0.126922
4	5.06225e+07	7.36145e+07			6.21185e+07	3.17983e+08	4.55439e+08			3.86711e+08	0.160633
5	5.0946e+07	2.14949e+07	5.82077e+07	5.92418e+07	4.74726e+07	5.77377e+08	2.2444e+08	5.00802e+08	5.31762e+08	4.58596e+08	0.103517
6	9.5268e+07	8.44076e+07	1.02992e+08		9.42226e+07	7.10026e+08	4.73696e+08	5.64784e+08		5.82835e+08	0.161662
7	1.46724e+08	1.25635e+08	1.18164e+08		1.30174e+08	4.87693e+08	4.47251e+08	3.55643e+08		4.30196e+08	0.302593
8	1.13262e+08	1.71973e+08	1.41881e+08		1.42372e+08	3.98124e+08	7.32114e+08	5.51782e+08		5.60674e+08	0.253931
9	1.41906e+08	7.83964e+07	1.52783e+08		1.24362e+08	4.6171e+08	2.71444e+08	5.62404e+08		4.31853e+08	0.287973
mean					9.41422e+07					5.08857e+08	0.190381
	30 μM NVP
	F(TMRE)				F(GFP)				F(TMRE)/F(GFP)
larva	neuromast 1	neuromast 2	neuromast 3	mean	neuromast 1	neuromast 2	neuromast 3	mean
1	8.69468e+07	8.26207e+07	1.11993e+08	9.38534e+07	3.17882e+08	2.65532e+08	5.16471e+08	3.66629e+08	0.25599
2	1.12377e+08	1.12921e+08	5.53873e+07	9.35618e+07	3.63428e+08	4.96267e+08	2.06607e+08	3.55434e+08	0.263232
3	1.89098e+08	2.04679e+08	1.8305e+08	1.92276e+08	5.02106e+08	3.79596e+08	4.92095e+08	4.57933e+08	0.419878
4	1.07075e+08	9.87587e+07	1.51481e+08	1.19105e+08	5.01346e+08	4.83714e+08	6.24306e+08	5.36455e+08	0.222022
5	1.49659e+08	2.51126e+08	2.32463e+08	2.11083e+08	4.34092e+08	3.4082e+08	3.51593e+08	3.75502e+08	0.562135
6	1.09553e+08	9.58613e+07	1.12123e+08	1.05846e+08	4.57264e+08	5.67365e+08	3.7266e+08	4.65763e+08	0.227253
7	3.65928e+08	1.70811e+08	2.71091e+08	2.69277e+08	4.68135e+08	4.0343e+08	5.00821e+08	4.57462e+08	0.588632
8	3.37185e+08	2.75304e+08	1.48787e+08	2.53759e+08	3.9476e+08	4.79015e+08	3.67217e+08	4.13664e+08	0.613441
9	1.75609e+08	1.70546e+08	1.8734e+08	1.77832e+08	5.18893e+08	5.08958e+08	4.74495e+08	5.00782e+08	0.355108
mean				1.6851e+08				4.36625e+08	0.389743
P-value by t test (TMRE/GFP)									0.0058
P-value by t test (TMRE)									<0.0001
