# Supplementary material for: Pregnancy-associated plasma protein-aa supports hair cell survival by regulating mitochondrial function
Source: eLife. 2019 Jun 17;8:e47061. doi: 10.7554/eLife.47061 (PMC6594750; doi:10.7554/eLife.47061)
Supplement: Figure 3—figure supplement 1—source data 1. [file elife-47061-fig3-figsupp1-data1.xlsx]

## Sheet: 1
Figure 3- supplemental figure 1: support cell survival post neomycin in wild type and pappaa mutants
mean number of support cells within 3 neuromasts per larva
	wild type																	pappaa p170
	0 μM				1 μM				10 μM				30 μM					0 μM				1 μM				10 μM				30 μM
	neuromast 1	neuromast 2	neuromast 3	mean	neuromast 1	neuromast 2	neuromast 3	mean	neuromast 1	neuromast 2	neuromast 3	mean	neuromast 1	neuromast 2	neuromast 3	mean		neuromast 1	neuromast 2	neuromast 3	mean	neuromast 1	neuromast 2	neuromast 3	mean	neuromast 1	neuromast 2	neuromast 3	mean	neuromast 1	neuromast 2	neuromast 3	mean
larva 1	38	50	41	43	64	64	68	65.3333	43	46	47	45.3333	55	43	47	48.3333		38	42	56	45.3333	55	32	47	44.6667	33	32	35	33.3333	39	46	43	42.6667
larva 2	38	44	38	40	36	42	48	42	20	33	48	33.6667	44	50	47	47		62	54	47	54.3333	40	58	42	46.6667	46	36	30	37.3333	49	43	52	48
larva 3	43	54	49	48.6667	48	49	33	43.3333	41	50	37	42.6667	33	66	46	48.3333		52	50	53	51.6667	47	50	34	43.6667	36	37	36	36.3333	47	37	47	43.6667
larva 4	46	52	46	48	40	36	38	38	43	51	46	46.6667	38	57	52	49		37	50	41	42.6667	47	52	41	46.6667	38	54	39	43.6667	44	52	48	48
larva 5	56	46	41	47.6667	47	46	48	47	22	24	38	28	37	42	53	44		47	50	46	47.6667	60	42	44	48.6667	48	54	49	50.3333	45	42	28	38.3333
larva 6	36	43	35	38	43	50	47	46.6667	58	52	47	52.3333	49	45	46	46.6667		36	34	31	33.6667	52	42	48	47.3333	40	72	47	53	45	48	34	42.3333
larva 7	32	51	54	45.6667					29	42	45	38.6667	42	43	39	41.3333		35	51	47	44.3333
larva 8	52	29	58	46.3333									39	54	43	45.3333		33	31	46	36.6667
larva 9	36	30	35	33.6667														55	52	57	54.6667
mean				43.4444				47.0556				41.0476				46.25					45.6667				46.2778				42.3333				43.8333
% support cell survival=[(mean number of support cells within 3 neuromasts after treatment)/ (mean number of support cells in vehicle treated group)] X 100
	wild type				pappaa p170
	1 μM	10 μM	30 μM		1 μM	10 μM	30 μM
larva 1	150.399	104.359	111.265		97.8031	72.9874	93.4238
larva 2	96.6851	77.5015	108.195		102.182	81.7459	105.102
larva 3	99.7545	98.2198	111.265		95.6135	79.5562	95.6135
larva 4	87.477	107.428	112.799		102.182	95.6135	105.102
larva 5	108.195	64.4567	101.289		106.562	110.211	83.9355
larva 6	107.428	120.473	107.428		103.642	116.05	92.694
larva 7		89.0117	95.1504
larva 8			104.359
mean	108.323	95.4062	108.707		101.331	92.694	95.9784
P-value by 2-way ANOVA (wild type vs. pappaa p170)					0.7951	0.9674	0.555
