# Supplementary material for: Pregnancy-associated plasma protein-aa supports hair cell survival by regulating mitochondrial function
Source: eLife. 2019 Jun 17;8:e47061. doi: 10.7554/eLife.47061 (PMC6594750; doi:10.7554/eLife.47061)
Supplement: Figure 3—source data 1. [file elife-47061-fig3-data1.xlsx]

## Sheet: 1
Figure 3B: hair cell survival post neomycin in wild type and pappaa mutants
mean number of hair cells within 3 neuromasts per larva
	wild type																	pappaa p170
	0 μM				1 μM				10 μM				30 μM					0 μM				1 μM				10 μM				30 μM
experiment 1	neuromast 1	neuromast 2	neuromast 3	mean	neuromast 1	neuromast 2	neuromast 3	mean	neuromast 1	neuromast 2	neuromast 3	mean	neuromast 1	neuromast 2	neuromast 3	mean		neuromast 1	neuromast 2	neuromast 3	mean	neuromast 1	neuromast 2	neuromast 3	mean	neuromast 1	neuromast 2	neuromast 3	mean	neuromast 1	neuromast 2	neuromast 3	mean
larva 1	12	14	9	11.6667	13	13	12	12.6667	10	4	7	7	9	6	6	7		15	14	10	13	14	16	11	13.6667	4	3	3	3.33333	4	1	0	1.66667
larva 2	13	14	9	12	11	11	9	10.3333	8	13	6	9	4	2	1	2.33333		9	9	13	10.3333	10	9	11	10	6	4	5	5	2	4	0	2
larva 3	10	13	7	10	11	9	7	9	3	4	8	5	6	7	6	6.33333		12	9	13	11.3333	12	12	9	11	4	6	6	5.33333	1	1	4	2
larva 4	6	7	8	7	10	9	9	9.33333	7	8	6	7	8	5	2	5		9	14	8	10.3333	16	10	13	13	7	9	6	7.33333	2	2	5	3
larva 5	10	13	16	13	9	8	6	7.66667	6	6	4	5.33333	7	5	4	5.33333		20	11	15	15.3333	9	10	13	10.6667	6	9	7	7.33333	3	5	4	4
larva 6	7	8	11	8.66667	13	12	12	12.3333	11	8	11	10						16	16	12	14.6667	10	13	7	10	7	2	5	4.66667
larva 7					12	11	16	13														12	10	14	12
experiment 2
larva 1	5	6	8	6.33333	12	11	11	11.3333	2	3	3	2.66667	6	6	3	5		13	12	15	13.3333	11	10	8	9.66667	3	5	2	3.33333	2	2	6	3.33333
larva 2	9	8	5	7.33333	7	8	14	9.66667	4	2	7	4.33333	4	1	3	2.66667		14	11	10	11.6667	9	7	11	9	5	6	5	5.33333	2	3	3	2.66667
larva 3	9	10	7	8.66667	9	11	3	7.66667	5	3	2	3.33333	5	5	3	4.33333		12	12	11	11.6667	10	13	12	11.6667	4	4	4	4	3	1	0	1.33333
larva 4	9	11	9	9.66667	11	13	7	10.3333	8	8	6	7.33333	8	5	2	5		13	15	15	14.3333	10	9	11	10	3	5	3	3.66667	4	2	1	2.33333
larva 5	9	5	8	7.33333	8	8	6	7.33333	8	7	7	7.33333	2	4	0	2		12	13	16	13.6667	11	9	8	9.33333	7	2	8	5.66667	2	3	3	2.66667
larva 6	9	12	11	10.6667	9	5	8	7.33333	3	7	4	4.66667	5	7	5	5.66667		10	9	10	9.66667	10	11	12	11	4	5	6	5	5	7	4	5.33333
larva 7	12	12	12	12					9	8	9	8.66667	3	3	3	3		13	13	13	13					2	5	2	3
larva 8	9	8	9	8.66667									6	3	0	3		10	10	15	11.6667
larva 9	7	9	8	8														15	15	18	16
mean experiment 1				10.3889				10.619				6.57143				4.80952					12.5				11.4762				5.5				2.53333
mean experiment 2				8.74074				8.94444				5.47619				3.83333					12.7778				10.1111				4.28571				2.94444
% HC survival=[(mean number of hair cells within 3 neuromasts after treatment)/ (mean number of hair cells in vehicle treated group)] X 100
	wild type					pappaa p170
	0 μM	1 μM	10 μM	30 μM		0 μM	1 μM	10 μM	30 μM
larva 1	112.287	121.912	67.3725	67.3725		104	109.333	26.6667	13.3333
larva 2	115.496	99.4546	86.6218	22.4575		82.6667	80	40	16
larva 3	96.2464	86.6218	48.1232	60.956		90.6667	88	42.6667	16
larva 4	67.3725	89.83	67.3725	48.1232		82.6667	104	58.6667	24
larva 5	125.12	73.7889	51.3314	51.3314		122.667	85.3333	58.6667	32
larva 6	83.4135	118.704	96.2464			117.333	80	37.3333
larva 7		125.12					96
larva 1	72.4638	129.672	30.5111	57.2082		104.33	75.639	26.0824	26.0824
larva 2	83.9054	110.603	49.5805	30.5111		91.2885	70.4225	41.7319	20.8659
larva 3	99.1609	87.7193	38.1388	49.5805		91.2885	91.2885	31.2989	10.433
larva 4	110.603	118.23	83.9054	57.2082		112.154	78.2473	28.6907	18.2577
larva 5	83.9054	83.9054	83.9054	22.8833		106.938	73.0308	44.3401	20.8659
larva 6	122.044	83.9054	53.3944	64.836		75.639	86.072	39.1236	41.7319
larva 7	137.3		99.1609	34.3249		101.721		23.4742
larva 8	99.1609			34.3249		91.2885
larva 9	91.5332					125.196
mean hair cell survival (% vehicle-treated group	100.001	102.267	65.8203	46.2398		99.9896	85.9513	38.3648	21.7791
P-value by 2-way ANOVA (wild type vs. pappaa p170)							0.0098	0.0001	0.0006
