# Supplementary material for: Pregnancy-associated plasma protein-aa supports hair cell survival by regulating mitochondrial function
Source: eLife. 2019 Jun 17;8:e47061. doi: 10.7554/eLife.47061 (PMC6594750; doi:10.7554/eLife.47061)
Supplement: Figure 3—source data 2. [file elife-47061-fig3-data2.xlsx]

## Sheet: 1
Figure 3C: hair cell survival post co-treatment of IGF1 and neomycin in wild type and pappaa mutants
mean number of hair cells within 3 neuromasts per larva
	pappaa+/+																							pappaa p170
Neomycin (µM)	0				10																		Neomycin (µM)	0				10
IGF1 (ng)	0				0				10				30				100						IGF1 (ng)	0				0				10				30				100
	neuromast 1	neuromast 2	neuromast 3	mean	neuromast 1	neuromast 2	neuromast 3	mean	neuromast 1	neuromast 2	neuromast 3	mean	neuromast 1	neuromast 2	neuromast 3	mean	neuromast 1	neuromast 2	neuromast 3	mean				neuromast 1	neuromast 2	neuromast 3	mean	neuromast 1	neuromast 2	neuromast 3	mean	neuromast 1	neuromast 2	neuromast 3	mean	neuromast 1	neuromast 2	neuromast 3	mean	neuromast 1	neuromast 2	neuromast 3	mean
larva 1	16	14	13	14.3333	8	8	8	8	5	5	8	6	10	9	6	8.33333	5	5	6	5.33333			larva 1	16	14	13	14.3333	4	6	1	3.66667	5	7	7	6.33333	5	6	1	4	9	9	13	10.3333
larva 2	11	11	10	10.6667	5	7	5	5.66667	4	5	3	4	10	10	10	10	5	7	8	6.66667			larva 2	16	17	12	15	7	7	0	4.66667	7	8	6	7	8	11	9	9.33333	9	9	9	9
larva 3	12	12	10	11.3333	8	8	9	8.33333	6	7	6	6.33333	11	9	8	9.33333	4	6	8	6			larva 3	18	17	15	16.6667	3	3	6	4	6	9	6	7	5	9	8	7.33333	5	6	8	6.33333
larva 4	14	11	15	13.3333	6	6	8	6.66667	4	7	7	6	6	5	7	6	7	8	8	7.66667			larva 4	18	18	15	17	4	2	0	2	4	5	6	5	11	3	4	6	7	7	8	7.33333
larva 5	10	15	10	11.6667	8	8	5	7	12	11	9	10.6667	5	8	6	6.33333	7	9	8	8			larva 5	8	16	20	14.6667	6	6	2	4.66667	4	3	5	4	9	9	5	7.66667	13	13	7	11
larva 6	11	9	9	9.66667	8	8	10	8.66667	3	7	8	6	6	8	8	7.33333	7	7	11	8.33333			larva 6	11	15	15	13.6667	4	1	3	2.66667	8	6	7	7	4	6	8	6	9	10	8	9
larva 7	13	11	11	11.6667	7	3	5	5	6	7	9	7.33333	4	6	8	6	10	8	10	9.33333			larva 7	16	10	11	12.3333	2	4	8	4.66667	3	5	6	4.66667	10	11	9	10	11	8	10	9.66667
larva 8	10	12	17	13	6	7	4	5.66667	6	8	6	6.66667					5	7	5	5.66667			larva 8	10	9	9	9.33333	6	7	5	6	12	4	6	7.33333
larva 9	11	12	17	13.3333	9	9	9	9															larva 9	11	12	8	10.3333
larva 10	12	9	17	12.6667																			larva 10	11	17	13	13.6667
larva 11	8	9	9	8.66667																			larva 11	12	13	13	12.6667
mean				11.8485				7.11111				6.625				7.61905				7.125			mean				13.6061				4.04167				6.04167				7.19048				8.95238
% HC survival=[(mean number of hair cells within 3 neuromasts after treatment)/ (mean number of hair cells in vehicle treated group)] X 100
				pappaa+/+					pappaa p170
			Neomycin (µM)	10	10	10	10		10	10	10	10
			IGF1 (ng)	0	10	30	100		0	10	30	100
			larva 1	67.5105	50.6329	70.3235	45.007		26.941	46.5344	29.3902	75.9246
			larva 2	47.82	33.7553	84.3882	56.2588		34.2885	51.4328	68.577	66.1278
			larva 3	70.3235	53.4459	78.7623	50.6329		29.3902	51.4328	53.8819	46.5344
			larva 4	56.2588	50.6329	50.6329	64.6976		14.6951	36.7377	44.0852	53.8819
			larva 5	59.0717	90.0141	53.4459	67.5105		34.2885	29.3902	56.3311	80.8229
			larva 6	73.1364	50.6329	61.8847	70.3235		19.5934	51.4328	44.0852	66.1278
			larva 7	42.1941	61.8847	50.6329	78.7623		34.2885	34.2885	73.4754	71.0262
			larva 8	47.82	56.2588		47.82		44.0852	53.8819
			larva 9	75.9494
			mean hair cell survival (% vehicle-treated group)	60.0094	55.9072	64.2958	60.1266		29.6963	44.3914	52.8323	65.778
	P-value by 2-way ANOVA (vehicle-treated vs. IGF1 in each genotype )				0.8783	0.8783	0.9848			0.024	0.0017	<0.0001
