# Supplementary material for: Pregnancy-associated plasma protein-aa supports hair cell survival by regulating mitochondrial function
Source: eLife. 2019 Jun 17;8:e47061. doi: 10.7554/eLife.47061 (PMC6594750; doi:10.7554/eLife.47061)
Supplement: Figure 3—source data 3. [file elife-47061-fig3-data3.xlsx]

## Sheet: 1
Figure 3D: hair cell survival post co-treatment of NBI-31772 and neomycin in wild type and pappaa mutants
mean number of hair cells within 3 neuromasts per larva
	wild type																		pappaa p170
Neomycin (µM)	0				10													Neomycin (µM)	0				10
NBI-31772 (µM)	0				0				30				100					NBI-31772 (µM)	0				0				30				100
	neuromast 1	neuromast 2	neuromast 3	mean	neuromast 1	neuromast 2	neuromast 3	mean	neuromast 1	neuromast 2	neuromast 3	mean	neuromast 1	neuromast 2	neuromast 3	mean			neuromast 1	neuromast 2	neuromast 3	mean	neuromast 1	neuromast 2	neuromast 3	mean	neuromast 1	neuromast 2	neuromast 3	mean	neuromast 1	neuromast 2	neuromast 3	mean
larva 1	16	14	13	14.3333	8	8	8	8	5	6	5	5.33333	12	14	9	11.6667		larva 1	16	14	13	14.3333	4	6	1	3.66667	3	4	6	4.33333	15	9	13	12.3333
larva 2	11	11	10	10.6667	5	7	5	5.66667	5	5	2	4	13	9	13	11.6667		larva 2	16	17	12	15	7	7	0	4.66667	8	4	11	7.66667	16	11	14	13.6667
larva 3	12	12	10	11.3333	8	8	9	8.33333	5	7	8	6.66667	8	9	12	9.66667		larva 3	18	17	15	16.6667	3	3	6	4	11	11	7	9.66667	10	14	9	11
larva 4	14	11	15	13.3333	6	6	8	6.66667	4	6	10	6.66667	8	7	9	8		larva 4	18	18	15	17	4	2	0	2	4	4	6	4.66667	8	7	11	8.66667
larva 5	10	15	10	11.6667	8	8	5	7	5	5	3	4.33333	14	8	11	11		larva 5	8	16	20	14.6667	6	6	2	4.66667	6	9	1	5.33333	13	9	12	11.3333
larva 6					8	8	10	8.66667	12	13	12	12.3333	9	8	10	9		larva 6					4	1	3	2.66667	9	4	6	6.33333	15	10	12	12.3333
larva 7					7	3	5	5	8	12	10	10	9	12	8	9.66667		larva 7					2	4	8	4.66667	4	4	7	5	13	9	9	10.3333
larva 8					6	7	4	5.66667					9	14	10	11		larva 8					6	7	5	6					12	9	8	9.66667
larva 9					9	9	9	9										larva 9
larva 10																		larva 10
mean				12.2667				7.11111				7.04762				10.2083		mean				15.5333				4.04167				6.14286				11.1667
% HC survival=[(mean number of hair cells within 3 neuromasts after treatment)/ (mean number of hair cells in vehicle treated group)] X 100
				wild type					pappaa p170
			Neomycin (µM)	10	10	10			10	10	10
			NBI-31772 (µM)	0	30	100			0	30	100
			larva 1	65.1997	43.4664	95.0829			23.6102	27.903	79.4162
			larva 2	46.1831	32.5998	95.0829			30.0494	49.3668	88.0017
			larva 3	67.9163	54.3331	78.7829			25.7566	62.2451	70.8307
			larva 4	54.3331	54.3331	65.1997			12.8783	30.0494	55.806
			larva 5	57.0497	35.3165	89.6496			30.0494	34.3421	72.977
			larva 6	70.633	100.516	73.3496			17.1711	40.7813	79.4162
			larva 7	40.7498	81.4996	78.7829			30.0494	32.1958	66.5379
			larva 8	46.1831		89.6496			38.6349		62.2451
			larva 9	73.3496
mean hair cell survival (% vehicle-treated group)				57.9553	57.4378	83.1975			26.0249	39.5548	71.9038
P-value by Two-way ANOVA (vehicle-treated vs. NBI-31772 in each genotype )					0.9471	0.0028				0.096	<0.0001
