# Supplementary material for: Pregnancy-associated plasma protein-aa supports hair cell survival by regulating mitochondrial function
Source: eLife. 2019 Jun 17;8:e47061. doi: 10.7554/eLife.47061 (PMC6594750; doi:10.7554/eLife.47061)
Supplement: Figure 4—source data 1. [file elife-47061-fig4-data1.xlsx]

## Sheet: 1
Figure 4B: hair cell survival post neomycin following induction of Pappaa expression at 4 dpf
mean number of hair cells within 3 neuromasts per larva
	no heatshock
	wild type; non-transgenic									pappaa p170; non-transgenic									pappaa p170; Tg(hsp70:pappaa-GFP)
Neomycin	0 μM				10 μM					0 μM				10 μM					0 μM				10 μM
	neuromast 1	neuromast 2	neuromast 3	mean	neuromast 1	neuromast 2	neuromast 3	mean		neuromast 1	neuromast 2	neuromast 3	mean	neuromast 1	neuromast 2	neuromast 3	mean		neuromast 1	neuromast 2	neuromast 3	mean	neuromast 1	neuromast 2	neuromast 3	mean
larva 1	12	14	14	13.3333	8	5	7	6.66667		16	13	14	14.3333	6	3	0	3		20	16	17	17.6667	5	4	0	3
larva 2	15	10	15	13.3333	4	6	5	5		15	17	13	15	4	3	2	3		18	18	14	16.6667	3	1	2	2
larva 3	17	14	16	15.6667	6	7	4	5.66667		14	15	12	13.6667	4	6	0	3.33333		14	14	10	12.6667	3	3	0	2
larva 4	16	15	13	14.6667	4	5	5	4.66667		14	17	18	16.3333	5	4	3	4		12	9	9	10	3	4	3	3.33333
larva 5	15	14	16	15	5	6	6	5.66667		18	12	15	15	2	2	2	2		16	20	22	19.3333	5	2	0	2.33333
larva 6	15	13	16	14.6667										2	4	4	3.33333		14	15	14	14.3333	6	3	2	3.66667
larva 7														2	2	0	1.33333
larva 8														3	3	1	2.33333
larva 9														3	4	0	2.33333
mean				14.4444				5.53333					14.8667				2.74074					15.1111				2.72222
	heatshock on 4 dpf
	wild type; non-transgenic									pappaa p170; non-transgenic									pappaa p170; Tg(hsp70:pappaa-GFP)
Neomycin	0 μM				10 μM					0 μM				10 μM					0 μM				10 μM
	neuromast 1	neuromast 2	neuromast 3	mean	neuromast 1	neuromast 2	neuromast 3	mean		neuromast 1	neuromast 2	neuromast 3	mean	neuromast 1	neuromast 2	neuromast 3	mean		neuromast 1	neuromast 2	neuromast 3	mean	neuromast 1	neuromast 2	neuromast 3	mean
larva 1	19	14	15	16	5	5	4	4.66667		15	17	20	17.3333	4	2	0	2		16	14	14	14.6667	6	5	2	4.33333
larva 2	14	13	12	13	6	6	7	6.33333		15	20	12	15.6667	2	2	4	2.66667		18	16	20	18	5	5	0	3.33333
larva 3	15	14	8	12.3333	7	6	5	6		19	15	14	16	3	3	0	2		15	16	18	16.3333	5	5	3	4.33333
larva 4	14	15	13	14	5	7	6	6		14	13	15	14	3	4	2	3		15	15	20	16.6667	6	6	3	5
larva 5	15	14	15	14.6667	5	6	5	5.33333		15	15	13	14.3333	3	2	1	2		15	13	12	13.3333	8	7	6	7
larva 6										13	15	13	13.6667	3	3	1	2.33333		14	16	8	12.6667	6	6	6	6
larva 7														4	6	1	3.66667						4	4	5	4.33333
larva 8														5	4	1	3.33333
larva 9														5	5	0	3.33333
mean				14				5.66667					15.1667				2.7037					15.2778				4.90476
% HC survival= [(mean number of hair cells within 3 neuormasts after treatment)/(mean number of hair cells in no heatshock and vehicle-treated group)]
	wild type; non-transgenic				pappaa p170; non-transgenic				pappaa p170; Tg(hsp70:pappaa-GFP)
	no heatshock	heatshock at 4dpf			no heatshock	heatshock at 4dpf			no heatshock	heatshock at 4dpf
Neomycin	10 μM	0 μM	10 μM		10 μM	0 μM	10 μM		10 μM	0 μM	10 μM
larva 1	46.1681	110.803	32.3176		20.1748	116.566	13.4499		19.8544	97.066	28.6786
larva 2	34.626	90.0277	43.8596		20.1748	105.358	17.9332		13.2363	119.126	22.0604
larva 3	39.2428	85.4109	41.5512		22.4165	107.599	13.4499		13.2363	108.096	28.6786
larva 4	32.3176	96.9529	41.5512		26.8998	94.1493	20.1748		22.0604	110.302	33.0907
larva 5	39.2428	101.57	36.9344		13.4499	96.3909	13.4499		15.4423	88.2418	46.3269
larva 6					22.4165	91.9076	15.6915		24.2665	83.8297	39.7088
larva 7					8.9666		24.6581				28.6786
larva 8					15.6915		22.4165
larva 9					15.6915		22.4165
mean hair cell survival (% vehicle-treated group	38.3195	96.9529	39.2428		18.7738	101.995	17.653		18.016	101.11	32.4604
p value by 2-way ANOVA (wt vs. non-transgenic pappaa p170)					<0.0001	0.6309	<0.0001
p value by two-way ANOVA (wt vs. transgeneic pappaa p170)									0.0001	0.6309	0.1375
p value by two-way ANOVA (non-transgenic pappaa p170 vs. transgeneic pappaa p170)									0.9188	0.8424	0.0011
