# Supplementary material for: Pregnancy-associated plasma protein-aa supports hair cell survival by regulating mitochondrial function
Source: eLife. 2019 Jun 17;8:e47061. doi: 10.7554/eLife.47061 (PMC6594750; doi:10.7554/eLife.47061)
Supplement: Figure 4—source data 2. [file elife-47061-fig4-data2.xlsx]

## Sheet: 1
Figure 4C: hair cell survival post neomycin in wild type and Tg(hsp70:dnIGF1Ra-GFP) larvae
mean number of hair cells within 3 neuromasts per larva
	no heatshock
	wild type																	hsp70:dnIGF1Ra-GFP
	0 μM				1 μM				10 μM				30 μM					0 μM				1 μM				10 μM				30 μM
	neuromast 1	neuromast 2	neuromast 3	mean	neuromast 1	neuromast 2	neuromast 3	mean	neuromast 1	neuromast 2	neuromast 3	mean	neuromast 1	neuromast 2	neuromast 3	mean		neuromast 1	neuromast 2	neuromast 3	mean	neuromast 1	neuromast 2	neuromast 3	mean	neuromast 1	neuromast 2	neuromast 3	mean	neuromast 1	neuromast 2	neuromast 3	mean
larva 1	19	22	11	17.3333	14	14	15	14.3333	8	4	8	6.66667	3	6	2	3.66667		14	13	18	15	10	12	11	11	8	5	6	6.33333	6	3	4	4.33333
larva 2	12	10	14	12	15	12	16	14.3333	7	6	6	6.33333	6	6	5	5.66667		9	14	12	11.6667	16	13	14	14.3333	6	6	4	5.33333	5	5	3	4.33333
larva 3	18	14	11	14.3333	14	14	15	14.3333	9	10	6	8.33333	4	4	4	4		18	16	17	17	15	12	12	13	6	6	8	6.66667	6	4	4	4.66667
larva 4	10	12	9	10.3333	11	11	8	10	10	10	5	8.33333	4	6	7	5.66667		18	14	11	14.3333	19	17	13	16.3333	4	4	5	4.33333	4	4	4	4
larva 5	14	12	10	12	13	12	13	12.6667	9	8	6	7.66667	8	7	6	7		14	15	17	15.3333	15	12	15	14	6	6	6	6	2	6	6	4.66667
larva 6	13	16	9	12.6667	14	14	10	12.6667	6	4	5	5	5	4	4	4.33333		18	10	13	13.6667					7	8	8	7.66667	11	6	4	7
larva 7	13	13	16	14									7	4	3	4.66667		13	13	14	13.3333					7	9	5	7	4	5	4	4.33333
larva 8	13	10	8	10.3333														13	15	16	14.6667					4	8	7	6.33333	6	5	5	5.33333
larva 9
larva 10
larva 11
larva 12
mean				12.875				13.0556				7.05556				5					14.6667				13.7333				6.33333				5.33333
	heatshock
	wild type																	hsp70:dnIGF1Ra-GFP
	0 μM				1 μM				10 μM				30 μM					0 μM				1 μM				10 μM				30 μM
	neuromast 1	neuromast 2	neuromast 3	mean	neuromast 1	neuromast 2	neuromast 3	mean	neuromast 1	neuromast 2	neuromast 3	mean	neuromast 1	neuromast 2	neuromast 3	mean		neuromast 1	neuromast 2	neuromast 3	mean	neuromast 1	neuromast 2	neuromast 3	mean	neuromast 1	neuromast 2	neuromast 3	mean	neuromast 1	neuromast 2	neuromast 3	mean
	13	14	16	14.3333	11	12	16	13	8	4	9	7	6	6	5	5.66667		12	11	12	11.6667	6	6	5	5.66667	2	3	4	3	3	2	0	1.66667
	16	13	9	12.6667	9	12	10	10.3333	5	6	8	6.33333	5	5	6	5.33333		14	15	14	14.3333	5	5	4	4.66667	3	4	5	4	1	2	0	1
	14	12	13	13	15	16	8	13	8	6	5	6.33333	5	6	5	5.33333		15	17	12	14.6667	4	5	6	5	2	4	0	2	3	3	1	2.33333
	18	10	9	12.3333	14	10	17	13.6667	6	6	3	5	6	7	4	5.66667		16	14	17	15.6667	7	8	0	5	2	2	0	1.33333	2	0	0	0.666667
	14	13	15	14	11	9	7	9	9	6	6	7	5	6	4	5		16	15	9	13.3333	10	3	5	6	6	8	2	5.33333	2	4	4	3.33333
	12	6	14	10.6667	10	12	11	11	6	6	4	5.33333	3	4	6	4.33333		17	16	22	18.3333	4	4	8	5.33333	3	1	2	2	2	2	2	2
	10	10	14	11.3333	14	15	15	14.6667	8	4	10	7.33333	4	3	6	4.33333		20	15	10	15	5	6	12	7.66667	1	2	5	2.66667	4	2	0	2
					13	12	15	13.3333	7	6	4	5.66667	4	4	2	3.33333		11	14	16	13.6667
				12.619				12.25				6.25				4.875					14.5833				5.61905				2.90476				1.85714
% HC survival=[(mean number of hair cells within 3 neuromasts after treatment)/ (mean number of hair cells in no heatshock and vehicle-treated group)] X 100
	no heatshock				heatshock					no heatshock				heatshock
	wild type									hsp70:dnIGF1Ra-GFP
	0 μM	1 μM	10 μM	30 μM	0 μM	1 μM	10 μM	30 μM		0 μM	1 μM	10 μM	30 μM	0 μM	1 μM	10 μM	30 μM
larva 1	134.576	111.284	51.7598	28.4679	111.284	100.932	54.3478	43.9959		102.249	74.983	43.172	29.5387	79.5274	38.6276	20.4499	11.3611
larva 2	93.1677	111.284	49.1718	43.9959	98.3437	80.2277	49.1718	41.4079		79.5274	97.7051	36.3554	29.5387	97.7051	31.811	27.2665	6.81663
larva 3	111.284	111.284	64.6998	31.0559	100.932	100.932	49.1718	41.4079		115.883	88.6162	45.4442	31.811	99.9773	34.0832	13.6333	15.9055
larva 4	80.2277	77.6398	64.6998	43.9959	95.7557	106.108	38.8199	43.9959		97.7051	111.338	29.5387	27.2665	106.794	34.0832	9.08884	4.54442
larva 5	93.1677	98.3437	59.5238	54.3478	108.696	69.8758	54.3478	38.8199		104.522	95.4329	40.8998	31.811	90.8884	40.8998	36.3554	22.7221
larva 6	98.3437	98.3437	38.8199	33.6439	82.8157	85.4037	41.4079	33.6439		93.1606		52.2608	47.7164	124.972	36.3554	13.6333	13.6333
larva 7	108.696			36.2319	87.9917	113.872	56.9358	33.6439		90.8884		47.7164	29.5387	102.249	52.2608	18.1777	13.6333
larva 8	80.2277					103.52	43.9959	25.8799		99.9773		43.172	36.3554	93.1606
mean hair cell survival (% vehicle-treated group	99.9612	101.363	54.7792	38.8199	97.974	95.1087	48.5248	37.8494		97.9891	93.6151	42.3199	32.9471	99.4092	38.303	19.8007	12.6595
P-value by 2-way ANOVA (TLF vs. hsp70:dnIGF1Ra-GFP)											0.4796	0.081	0.48	0.78	<0.0001	<0.0001	<0.0001
P-value by 2-way ANOVA (hsp70:dnIGF1Ra-GFP heatshock vs. no heatshock)															<0.0001	<0.0001	<0.0001
