# Supplementary material for: Pregnancy-associated plasma protein-aa supports hair cell survival by regulating mitochondrial function
Source: eLife. 2019 Jun 17;8:e47061. doi: 10.7554/eLife.47061 (PMC6594750; doi:10.7554/eLife.47061)
Supplement: Figure 5—figure supplement 1—source data 1. [file elife-47061-fig5-figsupp1-data1.xlsx]

## Sheet: 1
Figure 5-figure supplement 1B: quantification of mean F(mitotracker) in wild type and pappaa mutant hair cells
	F(mitotracker)
	wild type					pappaa p170
larva	neuromast 1	neuromast 2	neuromast 3	neuromast 4	mean	neuromast 1	neuromast 2	neuromast 3	neuromast 4	mean
1	2.98229e+06	2.75404e+06	2.92625e+06	3.41514e+06	3.01943e+06	3.01087e+06	3.61963e+06	1.549e+06	2.47566e+06	2.66379e+06
2	2.60033e+06	2.49053e+06	835134	2.54718e+06	2.11829e+06	1.81066e+06	1.32983e+06	2.30296e+06		1.81448e+06
3	1.35348e+06	922089	922089		1.06589e+06	947863	275209	751629	537470	628043
4	1.20345e+06	1.29427e+06			1.24886e+06
5	1.23646e+06	880210	952138		1.02294e+06
Mean					1.69508e+06					1.70211e+06
P-value by t test										0.9926
