# Supplementary material for: Pregnancy-associated plasma protein-aa supports hair cell survival by regulating mitochondrial function
Source: eLife. 2019 Jun 17;8:e47061. doi: 10.7554/eLife.47061 (PMC6594750; doi:10.7554/eLife.47061)
Supplement: Figure 5—figure supplement 1—source data 2. [file elife-47061-fig5-figsupp1-data2.xlsx]

## Sheet: 1
Figure 5-figure supplement 1B: mean F(mitotracker) in wild type and pappaa mutant hair cells
	F(mitotracker)
	wild type				pappaa p170
larva	neuromast 1	neuromast 2	neuromast 3	mean	neuromast 1	neuromast 2	neuromast 3	mean
1	1.37559e+06	1.24447e+06	1.28309e+06	1.30105e+06	480711	357502	780088	539434
2	1.0731e+06	545637	1.14067e+06	919800	317906	715051	576689	536549
3	589979	610107	1.17755e+06	792545	330146	394192	522319	415552
4	558162	1.22046e+06	795796	858141	1.31557e+06	986664	1.34797e+06	1.21674e+06
5	1.08247e+06	856684	1.12756e+06	1.02224e+06	1.00853e+06	873018	619745	833765
6	1.1498e+06	878435	695284	907839	1.13026e+06	861148	1.01771e+06	1.00304e+06
7	1.09638e+06	1.11603e+06	1.27038e+06	1.16093e+06	944844	766876	1.04762e+06	919781
8					1.25808e+06	1.01971e+06	781759	1.01985e+06
9					1.37232e+06	1.86911e+06	1.94356e+06	1.72833e+06
10					1.33653e+06	1.4993e+06	847507	1.22778e+06
11					1.63026e+06	1.84535e+06	1.61477e+06	1.69679e+06
Mean				994649				1.01251e+06
P-value by t test								0.906
