# Supplementary material for: Pregnancy-associated plasma protein-aa supports hair cell survival by regulating mitochondrial function
Source: eLife. 2019 Jun 17;8:e47061. doi: 10.7554/eLife.47061 (PMC6594750; doi:10.7554/eLife.47061)
Supplement: Figure 5—source data 1. [file elife-47061-fig5-data1.xlsx]

## Sheet: 1
Figure 5B-B': mean F(FM1-43) and ratio of mean F(FM1-43) to mean F(GFP) in wild type and pappaa mutant hair cells
	wild type
	F(FM1-43)				F(GFP)
	neuromast 1	neuromast 2	neuromast 3	mean	neuromast 1	neuromast 2	neuromast 3	mean	F(FM1-43)/F(GFP)
larva 1	139658	234979	103721	159452	950496	1.57966e+06	768557	1.09957e+06	0.145014
larva 2	382008	267792	297531	315777	1.69572e+06	1.36716e+06	1.70991e+06	1.59093e+06	0.198486
larva 3	136626	81090.9	48259	88658.5	914031	586413	404570	635005	0.139619
larva 4	188011	305343	290104	261153	1.05769e+06	2.16357e+06	2.21578e+06	1.81235e+06	0.144096
larva 5	155271	253023	205797	204697	758358	1.74639e+06	1.34549e+06	1.28341e+06	0.159494
larva 6	311463	220518	172106	234696	2.15875e+06	2.06893e+06	1.79861e+06	2.00876e+06	0.116836
Mean				210739				1.40501e+06	0.150591
	pappaa p170
	F(FM1-43)					F(GFP)
	neuromast 1	neuromast 2	neuromast 3	neuromast 4	mean	neuromast 1	neuromast 2	neuromast 3	neuromast 4	mean	F(FM1-43)/F(GFP)
larva 1	308062	489464	502133	450300	437490	1.22017e+06	3.29828e+06	2.32485e+06	2.0479e+06	2.2228e+06	0.196819
larva 2	320981	210957	178730		236890	1.88115e+06	1.37286e+06	1.61233e+06		1.62211e+06	0.146038
larva 3	223901	153085	94196.5		157061	1.63806e+06	1.58347e+06	834436		1.35199e+06	0.11617
larva 4	50285.5	101042	50809.9		67379	1.0119e+06	1.03775e+06	523890		857846	0.0785444
larva 5	107977	83294.9			95635.7	1.33421e+06	1.13073e+06			1.23247e+06	0.0775968
larva 6	364592	378118	208318		317009	2.82533e+06	1.90649e+06	1.26108e+06		1.99763e+06	0.158693
Mean					218577					1.54748e+06	0.128977
P-value by t test (FM1-43/GFP)											0.4869
P-value by t test (FM1-43)											0.9087
