# Supplementary material for: Pregnancy-associated plasma protein-aa supports hair cell survival by regulating mitochondrial function
Source: eLife. 2019 Jun 17;8:e47061. doi: 10.7554/eLife.47061 (PMC6594750; doi:10.7554/eLife.47061)
Supplement: Figure 5—source data 2. [file elife-47061-fig5-data2.xlsx]

## Sheet: 1
Figure 5D-D': mean F(CellROX) and ratio of mean F(CellROX) to mean F(GFP) in wild type and pappaa mutant hair cells
	wild type
	F(CellROX)							F(GFP)
	neuromast 1	neuromast 2	neuromast 3	neuromast 4	neuromast 5	neuromast 6	mean	neuromast 1	neuromast 2	neuromast 3	neuromast 4	neuromast 5	neuromast 6	mean	F(CellROX)/F(GFP)
larva 1	59160.1	20435	35826.6	23860.2	27981.4	18025.8	30881.5	636267	148679	272267	237419	324373	464972	347330	0.0889112
larva 2	7920	16790.1	24020.3	11572.7	5369.15		13134.5	224489	236513	247014	305529	171753		237060	0.0554057
larva 3	21778.7	17356	18990.2				19375	112371	107907	112883				111054	0.174465
larva 4	14484.5	9502.17	9803.63	8367.46			10539.4	225542	112026	153560	157459			162147	0.0649994
larva 5	12635.7	17793.1	15591				15339.9	150498	162342	142698				151846	0.101023
Mean							17854.1							201887	0.0969609
	pappaa p170
	F(CellROX)							F(GFP)
	neuromast 1	neuromast 2	neuromast 3	neuromast 4	neuromast 5	neuromast 6	mean	neuromast 1	neuromast 2	neuromast 3	neuromast 4	neuromast 5	neuromast 6	mean	F(CellROX)/F(GFP)
larva 1	42947.8	34479.9	65304.4				47577.4	218312	290672	221856				243613	0.195299
larva 2	53296.1	53387.8	57239.5	36344.5			50067	378556	315891	230717	181711			276719	0.180931
larva 3	37888.2	35764.3	28457.4	10050.3	26386.5	37377.1	29320.6	261703	189631	180919	128490	260020	341102	226977	0.129179
larva 4	72211.1	35971.5	48891.7				52358.1	236239	95766	236108				189371	0.276484
larva 5	57107.3	30587.4					43847.4	102497	84392.9					93445	0.469232
larva 6	39024.9	56285.6	17983.9				37764.8	216204	68448.6					107473	0.35139
Mean							43489.2							189600	0.267086
P-value by t test (CellROX/GFP)															0.0185
P-value by t test (CellROX)															0.0007
