# Supplementary material for: Pregnancy-associated plasma protein-aa supports hair cell survival by regulating mitochondrial function
Source: eLife. 2019 Jun 17;8:e47061. doi: 10.7554/eLife.47061 (PMC6594750; doi:10.7554/eLife.47061)
Supplement: Figure 5—source data 3. [file elife-47061-fig5-data3.xlsx]

## Sheet: 1
Fig 5F-F': mean F(mitoSOX) and ratio of mean F(mitoSOX) to mean F(GFP) in wild type and pappaa mutant hair cells
	wild type
	F(mitoSOX)					F(GFP)
	neuromast 1	neuromast 2	neuromast 3	neuromast 4	mean	neuromast 1	neuromast 2	neuromast 3	neuromast 4	mean	F(mitoSOX)/F(GFP)
larva 1	226787	99344.3			163066	4.52257e+06	2.33133e+06			3.42695e+06	0.0475833
larva 2	176920	54481	78207.8		103203	3.71232e+06	3.15235e+06	3.61778e+06		3.49415e+06	0.0295359
larva 3	340402	70258.7	200292		203651	3.74827e+06	1.24873e+06	2.25756e+06		2.41819e+06	0.0842162
larva 4	407145	181317	213871		267444	3.65417e+06	2.42123e+06	2.45331e+06		2.84291e+06	0.0940743
larva 5	278913	190290	258473		242558	3.41534e+06	1.84565e+06	2.7898e+06		2.6836e+06	0.0903856
larva 6	300074	266562	313987	209640	272566	2.52215e+06	2.48128e+06	3.62635e+06	2.72121e+06	2.83775e+06	0.09605
Mean					208748						0.0736409
	pappaa p170
	F(mitoSOX)					F(GFP)
	neuromast 1	neuromast 2	neuromast 3	neuromast 4	mean	neuromast 1	neuromast 2	neuromast 3	neuromast 4	mean	F(mitoSOX)/F(GFP)
larva 1	536826	163951	345811		348863	5.44951e+06	1.42426e+06	3.79453e+06		3.5561e+06	0.0981027
larva 2	657085	386618	595229	408785	511929	5.0023e+06	3.80955e+06	4.05423e+06	3.60108e+06	4.11679e+06	0.124352
larva 3	294281	754227	648160	382628	519824	4.53698e+06	5.40154e+06	3.87226e+06	2.42626e+06	4.05926e+06	0.128059
larva 4	317776	613639	584220	623292	534732	1.6671e+06	3.26646e+06	3.03782e+06	1.09909e+06	2.26762e+06	0.235812
larva 5	546795	764403	444028	444028	549814	2.91138e+06	3.70676e+06	2.26418e+06	2.26418e+06	2.78663e+06	0.197304
larva 6	204258	357802	225356		262472	1.12302e+06	2.92096e+06	1.70813e+06		1.91737e+06	0.136892
Mean					454606						0.15342
P-value by t test (mitoSOX/GFP)											0.0112
P-value by t test (mitoSOX)											0.0024
