# Supplementary material for: Pregnancy-associated plasma protein-aa supports hair cell survival by regulating mitochondrial function
Source: eLife. 2019 Jun 17;8:e47061. doi: 10.7554/eLife.47061 (PMC6594750; doi:10.7554/eLife.47061)
Supplement: Figure 5—source data 4. [file elife-47061-fig5-data4.xlsx]

## Sheet: 1
Figure 5G: hair cell survival post Antimycin A treatment in wild type and pappaa mutants
mean number of hair cells within 3 neuromasts per larva
	wild type																		pappaa p170
	0 pM				100 pM				300 pM				500 pM						0 pM				100 pM				300 pM				500 pM
Antimycin A (pM)	neuromast 1	neuromast 2	neuromast 3	mean	neuromast 1	neuromast 2	neuromast 3	mean	neuromast 1	neuromast 2	neuromast 3	mean	neuromast 1	neuromast 2	neuromast 3	mean		Antimycin A (pM)	neuromast 1	neuromast 2	neuromast 3	mean	neuromast 1	neuromast 2	neuromast 3	mean	neuromast 1	neuromast 2	neuromast 3	mean	neuromast 1	neuromast 2	neuromast 3	mean
larva 1	14	10	9	11	13	13	14	13.3333	14	15	13	14	6	6	0	4		larva 1	13	12	16	13.6667	10	8	13	10.3333	6	11	15	10.6667	7	6	9	7.33333
larva 2	8	11	10	9.66667	7	9	12	9.33333	10	10	8	9.33333	5	10	16	10.3333		larva 2	13	17	11	13.6667	9	12	10	10.3333	16	11	15	14	6	4	0	3.33333
larva 3	16	12	10	12.6667	13	10	8	10.3333	12	14	14	13.3333	8	8	7	7.66667		larva 3	16	14	10	13.3333	11	15	8	11.3333	0	6	6	4	0	3	6	3
larva 4	12	12	16	13.3333	10	9	5	8	12	11	17	13.3333	8	7	7	7.33333		larva 4	15	17	11	14.3333	9	7	6	7.33333	10	11	11	10.6667	10	5	4	6.33333
larva 5	11	11	15	12.3333	11	10	11	10.6667	13	14	14	13.6667	5	8	6	6.33333		larva 5	13	16	14	14.3333	11	11	7	9.66667	9	7	7	7.66667	9	7	5	7
larva 6	13	13	10	12	12	9	13	11.3333	11	5	11	9	10	6	4	6.66667		larva 6	13	15	12	13.3333	16	13	10	13	5	13	17	11.6667	6	5	5	5.33333
larva 7	12	12	13	12.3333	10	9	12	10.3333	13	9	0	7.33333	7	10	6	7.66667		larva 7	16	16	12	14.6667	18	14	13	15	0	0	5	1.66667	3	2	3	2.66667
larva 8	14	10	10	11.3333	12	12	15	13	6	10	18	11.3333	11	10	5	8.66667		larva 8	12	15	17	14.6667	13	9	10	10.6667	4	5	6	5	2	10	4	5.33333
larva 9	12	14	9	11.6667	14	12	11	12.3333	12	20	8	13.3333	5	3	4	4		larva 9	14	18	10	14	13	14	10	12.3333	1	7	8	5.33333	0	0	0	0
larva 10	13	12	9	11.3333	10	9	9	9.33333					7	10	4	7		larva 10													3	0	3	2
mean				11.7667				10.8				11.6296				6.96667		mean				14				11				8.61905				5
% HC survival=[(mean number of hair cells within 3 neuromasts after treatment)/ (mean number of hair cells in vehicle treated group)] X 100
				wild type				pappaa p170
				100 pM	300 pM	500 pM		100 pM	300 pM	500 pM
			larva 1	113.282	118.946	33.9847		73.8095	76.1905	52.381
			larva 2	79.2976	79.2976	87.7938		73.8095	100	23.8095
			larva 3	87.7938	113.282	65.1374		80.9524	28.5714	21.4286
			larva 4	67.9694	113.282	62.3053		52.381	76.1905	45.2381
			larva 5	90.6259	116.114	53.8091		69.0476	54.7619	50
			larva 6	96.29	76.4656	56.6412		92.8571	83.3333	38.0952
			larva 7	87.7938	62.3053	65.1374		107.143	11.9048	19.0476
			larva 8	110.45	96.29	73.6335		76.1905	35.7143	38.0952
			larva 9	104.786	113.282	33.9847		88.0952	38.0952	0
			larva 10	79.2976		59.4732				14.2857
			mean hair cell survival (% vehicle-treated group)	91.7587	98.8074	59.19		79.3651	56.0847	30.2381
		P-value by 2-way ANOVA						0.1726	<0.0001	0.0033
