# Supplementary material for: Pregnancy-associated plasma protein-aa supports hair cell survival by regulating mitochondrial function
Source: eLife. 2019 Jun 17;8:e47061. doi: 10.7554/eLife.47061 (PMC6594750; doi:10.7554/eLife.47061)
Supplement: Figure 6—source data 1. [file elife-47061-fig6-data1.xlsx]

## Sheet: 1
Figure 6B: quantification of mean F(mitoGCaMP) in wild type and pappaa mutant hair cells
	F(mitoGCaMP)
	wild type					pappaa p170
	neuromast 1	neuromast 2	neuromast 3	neuromast 4	mean	neuromast 1	neuromast 2	neuromast 3	mean
larva 1	436629	428267	445051		436649	263953	291955	232787	262898
larva 2	156406	369109	348589		291368	821490	532628	856948	737022
larva 3	334794	193555			264175	985742	930827	912840	943137
larva 4	452720	239942			346331	407796	644904	375212	475971
larva 5	253695	185347	157398		198814	374815	213656		294235
larva 6	234701	252552			243626	333155	185524	246657	255112
larva 7	255366	214094	171865	212835	213540	291973	195698	397847	295172
larva 8						540024	542050	815063	632379
larva 9						566151	848048	727968	714055
Mean					284929				512220
P-value by t test									0.0303
