# Supplementary material for: Pregnancy-associated plasma protein-aa supports hair cell survival by regulating mitochondrial function
Source: eLife. 2019 Jun 17;8:e47061. doi: 10.7554/eLife.47061 (PMC6594750; doi:10.7554/eLife.47061)
Supplement: Figure 6—source data 2. [file elife-47061-fig6-data2.xlsx]

## Sheet: 1
Fig 6D-D': mean F(TMRE) and ratio of mean F(TMRE) to mean F(GFP) in wild type and pappaa mutant hair cells
	wild type
	F(TMRE)				F(GFP)				F(TMRE/GFP)
	neuromast 1	neuromast 2	neuromast 3	mean	neuromast 1	neuromast 2	neuromast 3	mean
larva 1	2.29228e+07	2.27627e+07	1.40222e+07	1.99025e+07	7.83121e+07	9.57496e+07	5.50831e+07	7.63816e+07	0.260567
larva 2	2.58705e+07	1.90662e+07	2.0773e+07	2.19032e+07	8.11782e+07	7.46643e+07	7.35847e+07	7.64757e+07	0.286407
larva 3	3.35737e+07	2.59431e+07	1.08611e+07	2.34593e+07	9.7311e+07	7.15884e+07	2.84637e+07	6.57877e+07	0.356591
larva 4	3.94012e+07	3.81607e+06	2.53498e+07	2.28557e+07	8.27646e+07	8.48994e+06	6.38434e+07	5.16993e+07	0.442088
larva 5	1.61649e+07	2.81202e+07	1.72003e+07	2.04951e+07	5.64337e+07	8.65538e+07	8.44163e+07	7.58013e+07	0.27038
larva 6	2.54557e+07	2.77432e+07		2.65994e+07	8.62939e+07	9.57932e+07		9.10436e+07	0.292162
Mean				2.25359e+07				7.28649e+07	0.318033
	pappaa p170
	F(TMRE)					F(GFP)					F(TMRE/GFP)
	neuromast 1	neuromast 2	neuromast 3	neuromast 4	mean	neuromast 1	neuromast 2	neuromast 3	neuromast 4	mean
larva 1	5.33296e+07	4.48242e+07	6.22049e+07		5.34529e+07	1.13663e+08	1.09096e+08	1.37257e+08		1.20005e+08	0.445421
larva 2	4.24945e+07	4.4105e+07			4.32997e+07	1.15673e+08	8.36632e+07			9.96682e+07	0.434439
larva 3	6.39741e+07	5.97031e+07	3.2465e+07	4.7311e+07	5.08633e+07	1.05107e+08	1.48069e+08	6.70488e+07	8.8205e+07	1.02107e+08	0.498135
larva 4	7.52957e+07	8.46241e+07	2.19926e+07		6.06375e+07	1.04069e+08	1.18039e+08	4.22111e+07		8.81064e+07	0.68823
larva 5	5.11236e+07	7.82831e+07	4.84046e+07		5.92704e+07	5.29662e+07	8.14834e+07	6.05941e+07		6.50146e+07	0.911649
larva 6	3.84222e+07	3.31768e+07	3.06691e+07		3.40894e+07	6.06756e+07	6.02578e+07	5.53256e+07		5.8753e+07	0.580215
larva 7	3.00555e+07	1.81278e+07			2.40917e+07	8.28094e+07	4.99689e+07			6.63892e+07	0.362886
larva 8	3.96628e+07	2.50443e+07	3.92172e+07		3.46414e+07	8.5973e+07	3.95629e+07	9.74024e+07		7.43128e+07	0.466157
Mean					4.50433e+07					8.42946e+07	0.548392
P-value by t test (TMRE/GFP)											0.0052
P-value by t test (TMRE)											0.0028
