# Supplementary material for: Pregnancy-associated plasma protein-aa supports hair cell survival by regulating mitochondrial function
Source: eLife. 2019 Jun 17;8:e47061. doi: 10.7554/eLife.47061 (PMC6594750; doi:10.7554/eLife.47061)
Supplement: Figure 6—source data 3. [file elife-47061-fig6-data3.xlsx]

## Sheet: 1
Figure 6E: hair cell survival post Cyclosporin A in wild type and pappaa mutants
mean number of hair cells within 3 neuromasts per larva
	wild type																						pappaa p170
	0				0.3				1				0				3							0				0.3				1				0				3
Cyclosporin A (μM)	neuromast 1	neuromast 2	neuromast 3	mean	neuromast 1	neuromast 2	neuromast 3	mean	neuromast 1	neuromast 2	neuromast 3	mean	neuromast 1	neuromast 2	neuromast 3	mean	neuromast 1	neuromast 2	neuromast 3	mean			Cyclosporin A (μM)	neuromast 1	neuromast 2	neuromast 3	mean	neuromast 1	neuromast 2	neuromast 3	mean	neuromast 1	neuromast 2	neuromast 3	mean	neuromast 1	neuromast 2	neuromast 3	mean	neuromast 1	neuromast 2	neuromast 3	mean
larva 1	14	7	10	10.3333	11	8	8	9	13	9	15	12.3333	11	11	12	11.3333	20	15	12	15.6667			larva 1	15	14	14	14.3333	17	12	14	14.3333	12	4	14	10	15	14	14	14.3333	14	10	10	11.3333
larva 2	12	8	8	9.33333	11	10	10	10.3333	12	8	16	12	12	10	12	11.3333	16	15	12	14.3333			larva 2	17	14	21	17.3333	13	13	10	12	9	5	7	7	17	14	21	17.3333	16	13	14	14.3333
larva 3	11	11	13	11.6667	15	18	16	16.3333	9	10	12	10.3333	12	10	17	13	10	10	12	10.6667			larva 3	20	12	8	13.3333	14	13	12	13	17	12	22	17	20	12	8	13.3333	10	6	4	6.66667
larva 4	12	15	8	11.6667	15	14	12	13.6667	14	14	18	15.3333	17	14	14	15	11	12	9	10.6667			larva 4	21	15	11	15.6667	13	10	10	11	14	17	7	12.6667	21	15	11	15.6667	8	7	4	6.33333
larva 5	8	14	10	10.6667	7	7	7	7	11	12	15	12.6667	16	15	17	16	11	10	9	10			larva 5	15	14	16	15	11	16	14	13.6667	2	9	13	8	15	14	16	15	15	8	12	11.6667
larva 6	14	8	6	9.33333	12	8	12	10.6667	11	13	16	13.3333	14	13	15	14	10	22	18	16.6667			larva 6	20	18	19	19	9	12	6	9	20	15	5	13.3333	20	18	19	19	6	4	5	5
larva 7	17	15	12	14.6667	12	14	10	12	5	3	12	6.66667	11	13	13	12.3333	7	14	12	11			larva 7	16	14	10	13.3333	11	11	7	9.66667	12	13	10	11.6667	16	14	10	13.3333	8	11	10	9.66667
larva 8	12	4	10	8.66667	8	10	10	9.33333															larva 8					11	14	10	11.6667	3	9	0	4
larva 9					11	10	13	11.3333															larva 9					8	14	8	10	9	12	10	10.3333
																							larva 10					12	18	8	12.6667
mean				10.7917				11.0741				11.8095				13.2857				12.7143			mean				15.4286				11.7				10.4444				15.4286				9.28571
% HC survival=[(mean number of hair cells within 3 neuromasts after treatment)/ (mean number of hair cells in vehicle treated group)] X 100
				wild type				pappaa p170
			Cyclosporin A (μM)	0.3	1	3		0.3	1	3
			larva 1	83.4106	114.303	117.883		92.8926	64.8088	73.45
			larva 2	95.7677	111.214	107.851		77.7706	45.3662	92.8926
			larva 3	151.375	95.7677	80.2608		84.2515	110.175	43.2059
			larva 4	126.66	142.107	80.2608		71.2897	82.0912	41.0456
			larva 5	64.8749	117.393	75.2445		88.572	51.8471	75.6103
			larva 6	98.857	123.571	125.408		58.3279	86.4118	32.4044
			larva 7	111.214	61.7856	82.769		62.6485	75.6103	62.6485
			larva 8	86.4998				75.6103	25.9235
			larva 9	105.036				64.8088	66.9691
			larva 10					82.0912
			mean hair cell survival (% vehicle-treated group)	102.633	109.449	95.6681		75.8263	67.6892	60.1796
		P-value by 2-way ANOVA						0.0183	0.0183	0.0129
