# Supplementary material for: Pregnancy-associated plasma protein-aa supports hair cell survival by regulating mitochondrial function
Source: eLife. 2019 Jun 17;8:e47061. doi: 10.7554/eLife.47061 (PMC6594750; doi:10.7554/eLife.47061)
Supplement: Figure 7—source data 1. [file elife-47061-fig7-data1.xlsx]

## Sheet: 1
Figure 7A: quantification of antioxidant transcript expression in wild type and pappaa mutant hair cells
Sample Name	Target Name	Cт	ΔCт (target gene-Bactin)	Cт Mean	Cт SD	ΔCт Mean	ΔΔCт (ΔCт target gene- mean ΔCт WT target gene)	RQ (fold change)	mean RQ	SEM	p value by t test
WT	B-actin	30.9384		30.8605	0.156495
WT	B-actin	30.9628
WT	B-actin	30.6804
MUT	B-actin	29.948		29.7652	0.158593
MUT	B-actin	29.6842
MUT	B-actin	29.6636
WT	CAT	35.8767	5.01622	35.8417	0.0577663	4.98121	0.0350242	0.976015
WT	CAT	35.8734	5.01286				0.0316635	0.978292
WT	CAT	35.775	4.91453				-0.066668	1.0473	1.00053	0.0233898
MUT	CAT	34.9149	5.14971	34.8518	0.0752674	5.08662	0.168509	0.889762
MUT	CAT	34.7535	4.98834				0.00714004	0.995063
MUT	CAT	34.9064	5.14121				0.160006	0.895021
MUT	CAT	34.8324	5.06721				0.0860127	0.942123	0.930492	0.0245321	0.102084
WT	GpX	34.8183	3.95776	34.807	0.0158553	3.94654	0.0112114	0.992259
WT	GpX	34.7958	3.93533				-0.0112114	1.0078	1.00003	0.00777123
MUT	GpX	34.9154	5.15018	34.9052	0.0631955	5.14004	1.20368	0.434167
MUT	GpX	34.9627	5.19755				1.25105	0.420144	0.437511
MUT	GpX	34.8376	5.07238				1.12588	0.458222		0.0111187	0.000184452
WT	SOD1	33.4643	2.6038	33.2441	0.190724	2.38358	0.220198	0.858447
WT	SOD1	33.1321	2.27161				-0.111989	1.08072
WT	SOD1	33.1358	2.27533				-0.10827	1	0.979722	0.06496
MUT	SOD1	32.9352	3.17003	32.9065	0.028272	3.14131	0.786426	0.579778
MUT	SOD1	32.8787	3.1135				0.729904	0.602944
MUT	SOD1	32.9056	3.14041				0.756813	0.591802	0.591508	0.00668894	0.0121638
WT	SOD2	34.6061	3.74561	34.9089	0.296176	4.04844	-0.302794	1.23353
WT	SOD2	34.9227	4.06223				0.0138295	0.99046
WT	SOD2	35.198	4.33748				0.289075	0.818427	1.01414	0.120414
MUT	SOD2	35.3399	5.57471	35.4942	0.366281	5.72898	1.52631	0.347165
MUT	SOD2	35.2303	5.46507				1.41667	0.374576
MUT	SOD2	35.9124	6.14716				2.09876	0.233459	0.3184	0.0432014	0.0121638
