# Supplementary material for: Pregnancy-associated plasma protein-aa supports hair cell survival by regulating mitochondrial function
Source: eLife. 2019 Jun 17;8:e47061. doi: 10.7554/eLife.47061 (PMC6594750; doi:10.7554/eLife.47061)
Supplement: Figure 7—source data 2. [file elife-47061-fig7-data2.xlsx]

## Sheet: 1
Figure 7B: Hair cell survival post co-treatment with mitoTEMPO and neomycin in wild type and pappaa mutants
mean number of hair cells within 3 neuromasts per larva
	wild type
Neomycin (μM)	0				10				10				10				10
mitoTEMPO (μM)	0				0				10				50				100
	neuromast 1	neuromast 2	neuromast 3	mean	neuromast 1	neuromast 2	neuromast 3	mean	neuromast 1	neuromast 2	neuromast 3	mean	neuromast 1	neuromast 2	neuromast 3	mean	neuromast 1	neuromast 2	neuromast 3	mean
larva 1	9	8	8	8.33333	6	5	10	7	2	0	4	2	11	9	12	10.6667	13	10	12	11.6667
larva 2	16	11	10	12.3333	9	9	9	9	8	8	11	9	12	13	10	11.6667	14	13	15	14
larva 3	16	14	19	16.3333	6	5	4	5	9	5	3	5.66667	12	14	9	11.6667	14	11	17	14
larva 4	16	11	10	12.3333	8	11	11	10	5	6	4	5	9	13	13	11.6667	11	9	13	11
larva 5	14	16	8	12.6667	10	13	11	11.3333	4	5	6	5	11	13	11	11.6667	7	9	11	9
larva 6	10	11	10	10.3333	9	8	8	8.33333	5	5	6	5.33333	10	7	8	8.33333	11	16	13	13.3333
larva 7	10	11	18	13	9	8	7	8	11	12	9	10.6667	15	12	12	13	17	11	13	13.6667
larva 8	19	12	9	13.3333	10	11	12	11					14	10	10	11.3333	14	10	12	12
larva 9	11	13	12	12	7	8	8	7.66667					12	13	12	12.3333	11	14	12	12.3333
larva 10	14	9	13	12	12	12	11	11.6667					16	14	11	13.6667
mean				12.2667				8.38095				6.09524				11.2381				12.3333
	pappaa p170
Neomycin (μM)	0				10				10				10				10
mitoTEMPO (μM)	0				0				10				50				100
	neuromast 1	neuromast 2	neuromast 3	mean	neuromast 1	neuromast 2	neuromast 3	mean	neuromast 1	neuromast 2	neuromast 3	mean	neuromast 1	neuromast 2	neuromast 3	mean	neuromast 1	neuromast 2	neuromast 3	mean
larva 1	13	11	11	11.6667	4	3	5	4	4	7	0	3.66667	10	16	10	12	15	9	8	10.6667
larva 2	16	12	12	13.3333	4	6	5	5	6	4	7	5.66667	17	11	14	14	12	10	17	13
larva 3	6	9	8	7.66667	3	3	5	3.66667	7	4	8	6.33333	10	13	11	11.3333	10	11	12	11
larva 4	16	12	21	16.3333	7	7	5	6.33333	10	7	8	8.33333	13	13	10	12	9	8	14	10.3333
larva 5	11	7	18	12					8	8	8	8	13	13	11	12.3333	9	8	13	10
larva 6	16	12	11	13									8	9	11	9.33333	9	9	14	10.6667
larva 7	15	13	10	12.6667									11	11	8	10	11	11	13	11.6667
larva 8	14	15	18	15.6667													9	15	16	13.3333
larva 9	13	11	13	12.3333													12	9	10	10.3333
larva 10	10	12	9	10.3333													13	14	12	13
mean				12.5				4.75				6.4				11.5714				11.4
% HC survival=[(mean number of hair cells within 3 neuromasts after treatment)/ (mean number of hair cells in vehicle treated group)] X 100
	wild type					pappaa p170
Neomycin (μM)	10	10	10	10		10	10	10	10
mitoTEMPO (μM)	0	10	50	100		0	10	50	100
larva 1	56	16	85.3333	93.3333		32	29.3333	96	85.3333
larva 2	72	72	93.3333	112		40	45.3333	112	104
larva 3	40	45.3333	93.3333	112		29.3333	50.6667	90.6667	88
larva 4	80	40	93.3333	88		50.6667	66.6667	96	82.6667
larva 5	90.6667	40	93.3333	72			64	98.6667	80
larva 6	66.6667	42.6667	66.6667	106.667				74.6667	85.3333
larva 7	64	85.3333	104	109.333				80	93.3333
larva 8	88		90.6667	96					106.667
larva 9	61.3333		98.6667	98.6667					82.6667
larva 10	93.3333		109.333						104
mean	71.2	48.7619	92.8	98.6667		38	51.2	92.5714	91.2
P-value by Two-way ANOVA		0.4412	0.0023	0.0003			0.1755	<0.0001	<0.0001
