# Supplementary figures and images for: Pregnancy-associated plasma protein-aa supports hair cell survival by regulating mitochondrial function
Source: eLife journal article supplement (doi:10.7554/elife.47061), 2019-06-17

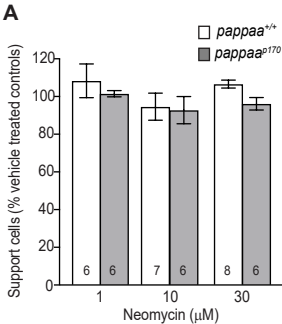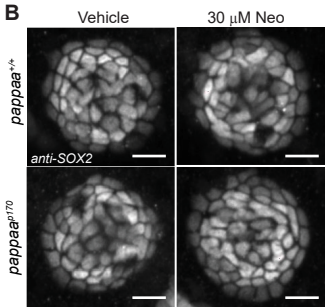

**Figure 3- figure supplement 1**

Supplement: supp [file elife-47061-supp-v1.zip]

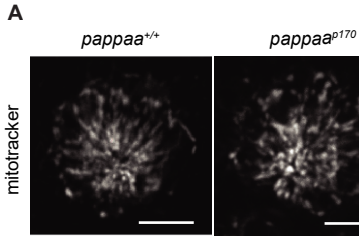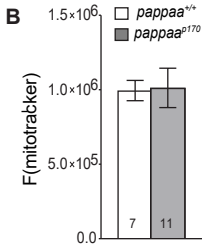

Figure 5 - figure supplement 1

Supplement: supp [file elife-47061-supp-v1.zip]
